# Supplementary material for: Congenital blindness is associated with large-scale reorganization of anatomical networks
Source: PubMed Central journal article supplement — Neuroimage. 2016 Mar;128:362–72. doi: 10.1016/j.neuroimage.2015.12.048 (PMC4767220; doi:10.1016/j.neuroimage.2015.12.048), 2016-03
Supplement: mmc1.pdf [file mmc1.pdf]

# Supplementary Materials for Hasson et al. “Congenital blindness is associated with large-scale reorganization of anatomical networks”

## Table of Contents

|                                                                                                                                                                 |   |
|-----------------------------------------------------------------------------------------------------------------------------------------------------------------|---|
| Supplementary Figure 1: Tests for differences in CT between blind and sighted for all brain regions parcellated by the FreeSurfer’s <i>Destrieux</i> atlas..... | 1 |
| Supplementary Figure 2: Differential covariance network identified via PLS.....                                                                                 | 2 |
| Supplementary Figure 3: Functional connectivity matrices for blind and sighted ....                                                                             | 3 |
| Supplementary Figure 4: NeuroSynth results for “visual” and “language comprehension” .....                                                                      | 4 |
| Supplementary analysis: Nodal features.....                                                                                                                     | 5 |
| Supplementary Figure 5: Distributions of node degree, clustering coefficient and betweenness centrality in blind and sighted.....                               | 6 |
| Supplementary Figure 6: Distributions of differences for nodal parameters.....                                                                                  | 7 |
| Supplementary Table 1: Characteristics of the blind participants. ....                                                                                          | 8 |
| Supplementary Table 2: Summary of regressions involving the superior occipital gyrus where the Group x Region interaction was significant. ....                 | 9 |

## Supplementary Figure 1: Tests for differences in CT between blind and sighted for all brain regions parcellated by the FreeSurfer’s *Destrieux* atlas

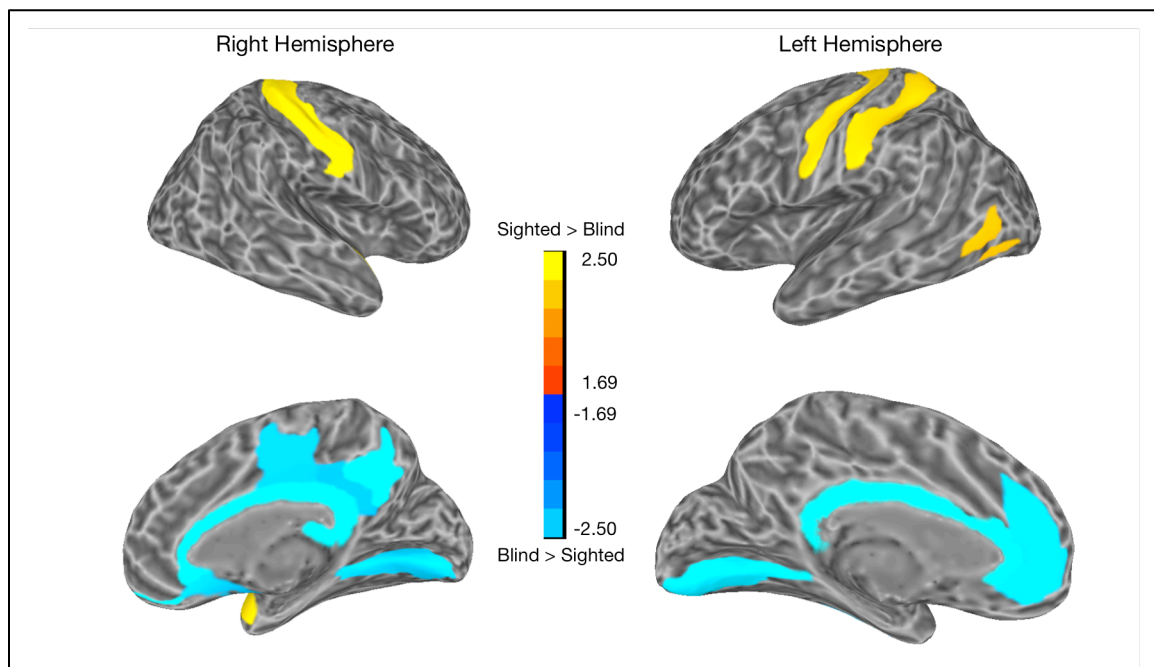

**Brain regions where cortical thickness differed for blind and sighted.** For each of the 148 brain regions in the FreeSurfer parcellation we evaluated whether cortical thickness differed between groups using a between-samples T-test. Warm/Cold colors indicate regions with greater CT for sighted/blind.

## Supplementary Figure 2: Differential covariance network identified via PLS

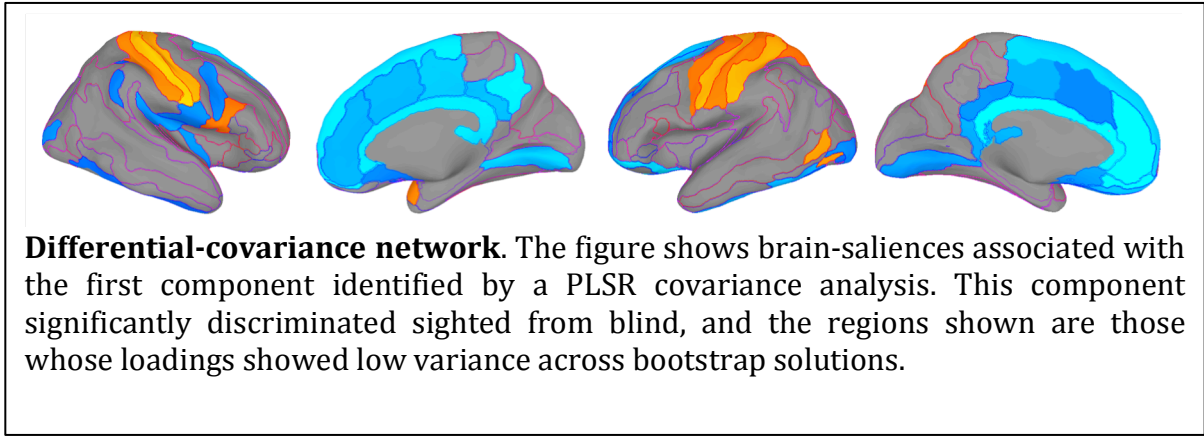

### Supplementary Figure 3: Functional connectivity matrices for blind and sighted

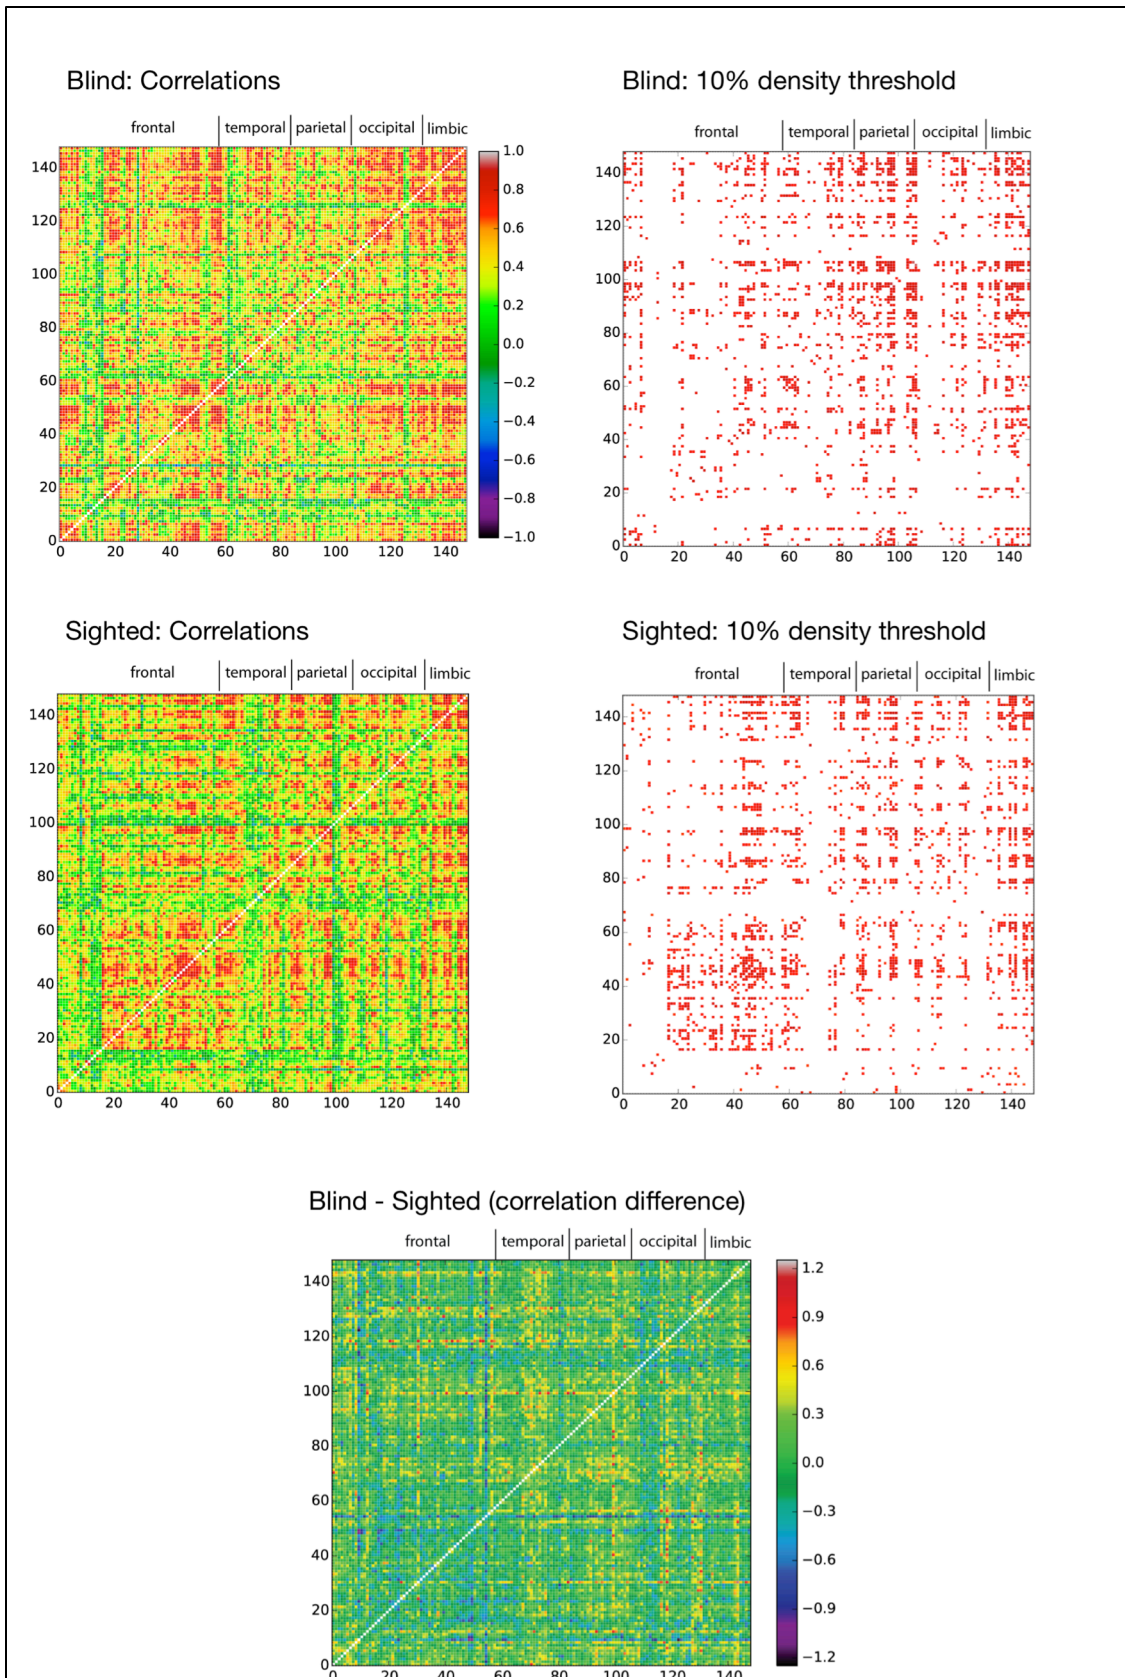

Supplementary Figure 4: NeuroSynth results for “visual” and “language comprehension”

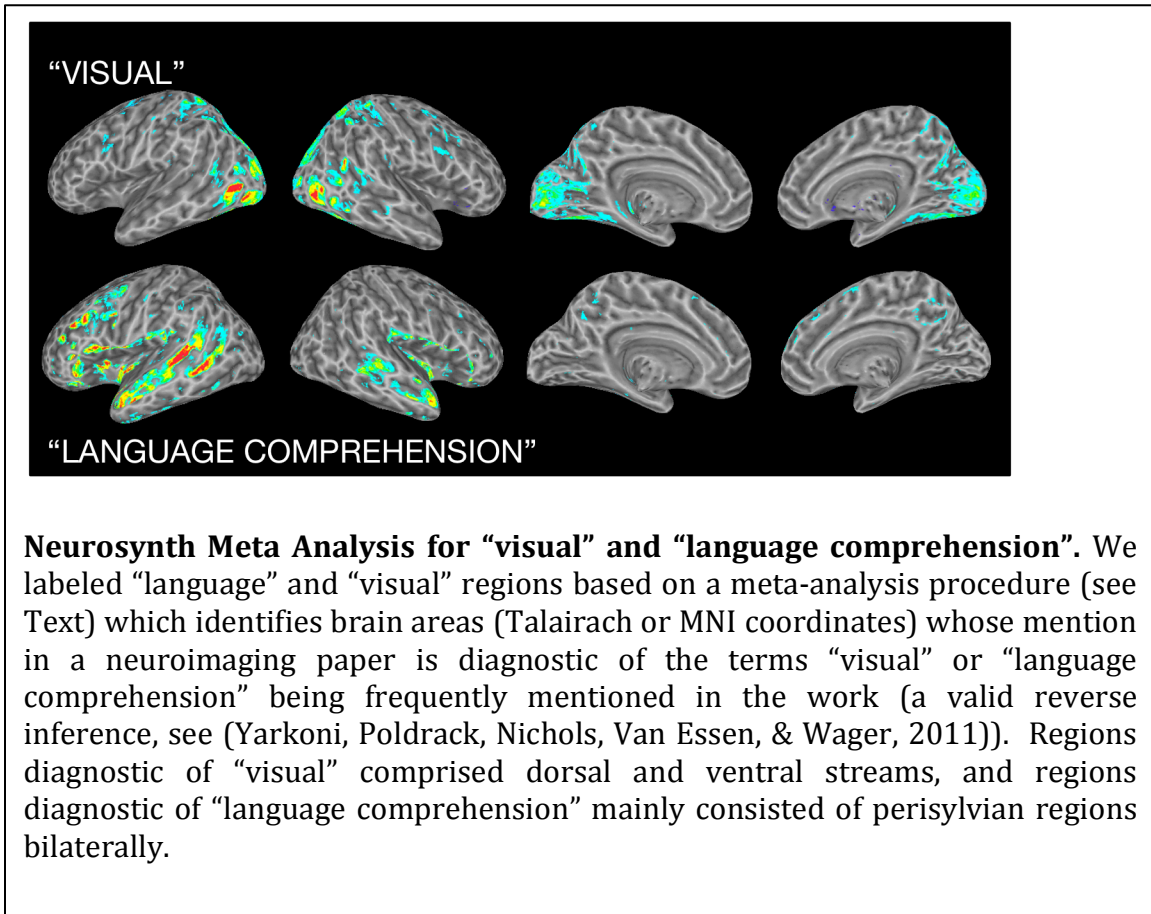

### Supplementary analysis: Nodal features

Our main interests in the current work were in the partition structure of blind and sighted networks, the status of language and visual regions within those, and identification of sub-networks or region-pairs whose covariance discriminated the populations. However, we also conducted a concise examination of three nodal features that are typically used to characterize network topology: Betweenness centrality, node degree distribution, and local clustering coefficient. *Betweenness centrality* is a property of any edge between two nodes and is defined by the number of shortest path lengths between nodes that pass through that edge. *Nodal degree* and *local clustering coefficient* are nodal properties, which quantify, respectively, the number of connections a node has and the degree to which its neighbors are connected within themselves (i.e., form a clique). As shown in Supplementary Figure 5, the distributions of these features were similar for blind and sighted.

However, a closer inspection suggests that the distributions of these values, even when highly similar, may conceal basic differences of the sort we identified throughout the manuscript. This is due to the fact that even if two distributions are identical, any given node can greatly shift in its position within the distribution. For instance, two node-degree distributions can be identical even if it were the case that region *A* had 60 connections in the blind and 10 in sighted, whereas region *B* had 10 connections in blind and 60 in sighted. In this way, such global topological metrics constitute summaries that may not directly speak to the specific organizational features that were of interest in the current work. To resolve this issue, we derived, for each node, the difference in node degree and clustering coefficient between the two populations and examined the resulting “difference distributions”. We found that these difference distributions indicated a considerable number of nodes whose degree or clustering coefficient strongly differed between blind and sighted (See Supplementary Figure 6). For this reason, while the topological distributions may suggest common abstract network-level characteristics, the specific instantiation of these networks differed between blind and sighted.

Supplementary Figure 5: Distributions of node degree, clustering coefficient and betweenness centrality in blind and sighted

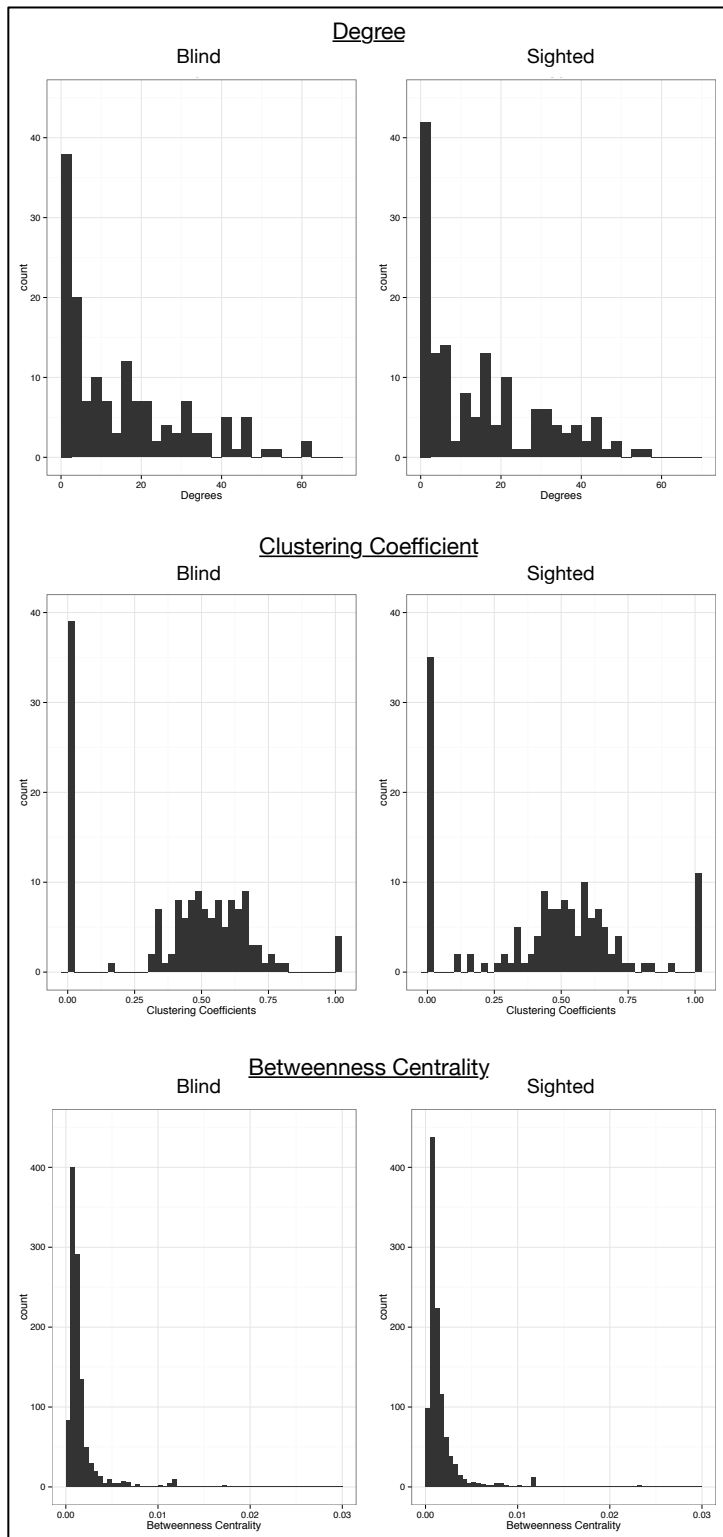

## Supplementary Figure 6: Distributions of differences for nodal parameters

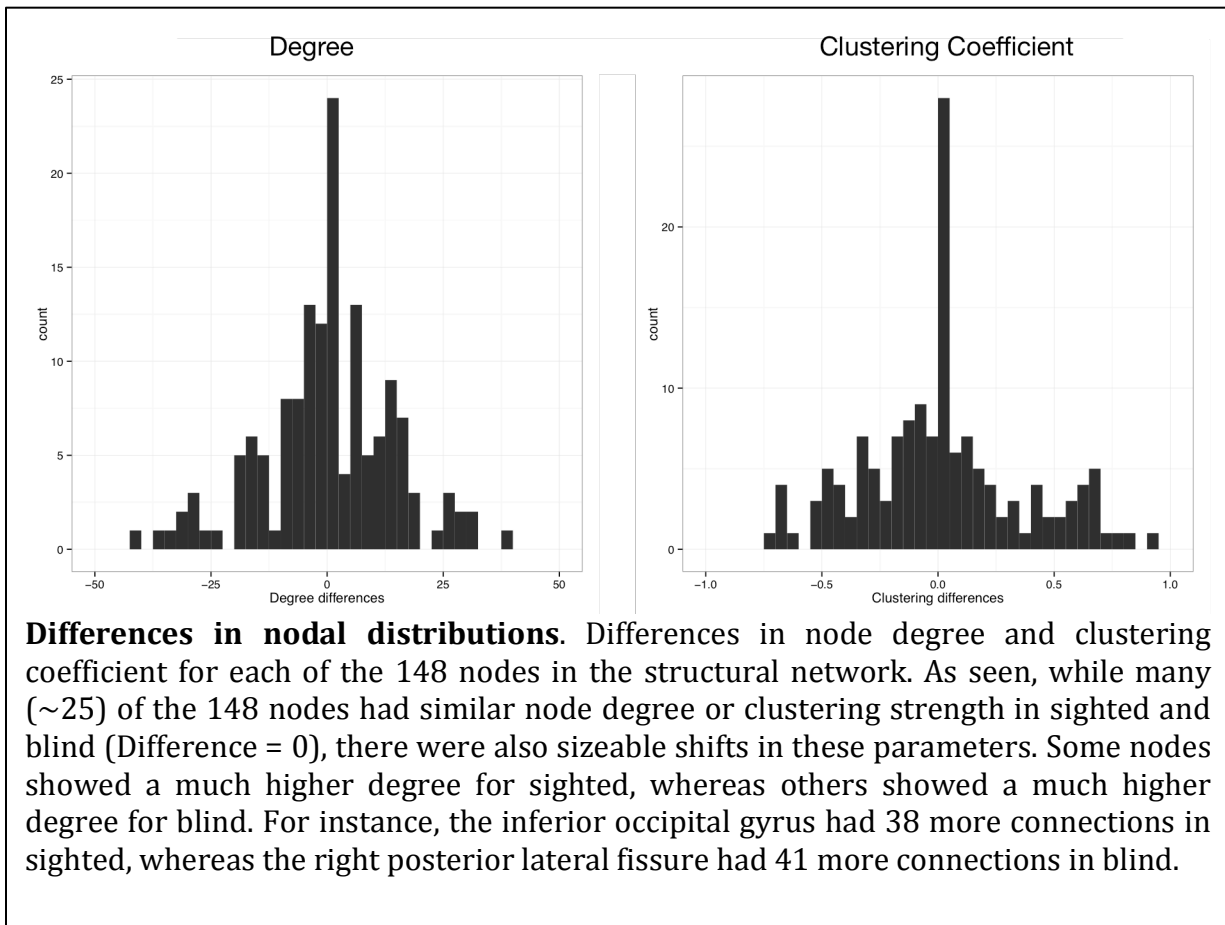

**Differences in nodal distributions.** Differences in node degree and clustering coefficient for each of the 148 nodes in the structural network. As seen, while many (~25) of the 148 nodes had similar node degree or clustering strength in sighted and blind (Difference = 0), there were also sizeable shifts in these parameters. Some nodes showed a much higher degree for sighted, whereas others showed a much higher degree for blind. For instance, the inferior occipital gyrus had 38 more connections in sighted, whereas the right posterior lateral fissure had 41 more connections in blind.

**Supplementary Table 1: Characteristics of the blind participants.**

| Subj. | Age | Sex | Hand | Residual visual perception | Onset | Cause of blindness                                | Education   | Musical Experience |
|-------|-----|-----|------|----------------------------|-------|---------------------------------------------------|-------------|--------------------|
| EB1   | 45  | M   | R    | No                         | 0     | Retinopathy of prematurity                        | University  | Yes                |
| EB2   | 62  | M   | R    | Diffuse light              | 0     | Congenital cataracts                              | College     | Yes                |
| EB3   | 55  | M   | R    | No                         | 0     | Electrical burn of optic nerve bilaterally        | High School | No                 |
| EB4   | 28  | M   | R    | No                         | 0     | Retinopathy of prematurity                        | University  | Yes                |
| EB5   | 57  | F   | R    | No                         | 0     | Chorioretinal atrophy associated to toxoplasmosis | College     | Yes                |
| EB6   | 31  | M   | R    | No                         | 0     | Leber's congenital amaurosis                      | University  | Yes                |
| EB7   | 54  | M   | R    | No                         | 0     | Glaucoma                                          | University  | Yes                |
| EB8   | 23  | M   | R    | Diffuse light              | 0     | Glaucoma and microphthalmia                       | University  | Yes                |
| EB9   | 43  | M   | R    | No                         | 0     | Retinopathy of prematurity                        | High school | Yes                |
| EB10  | 44  | M   | R    | Diffuse light              | 0     | Leber's congenital amaurosis                      | University  | No                 |
| EB11  | 31  | F   | R/A  | No                         | 0     | Retinopathy of prematurity                        | High school | No                 |
| EB12  | 60  | F   | R    | No                         | 0     | Retinopathy of prematurity                        | High school | Yes                |
| EB13  | 33  | F   | R    | No                         | 0     | Glaucoma                                          | High school | No                 |
| EB14  | 58  | F   | R    | No                         | 0     | Retinopathy of prematurity                        | College     | Yes                |
| EB15  | 51  | M   | R/A  | No                         | 0     | Major eye infection (Thalidomide victim)          | University  | Yes                |
| EB16  | 36  | F   | R    | No                         | 0     | Bilateral Retinoblastoma                          | College     | No                 |
| EB17  | 51  | M   | R    | No                         | 0     | Glaucoma                                          | University  | Yes                |
| EB18  | 48  | M   | R    | No                         | 0     | Glaucoma                                          | University  | Yes                |



**Supplementary Table 2: Summary of regressions involving the superior occipital gyrus where the Group x Region interaction was significant.**

| Predicted region | Predicting region | Slope sighted | Slope blind | Correlation sighted  | Correlation blind |
|------------------|-------------------|---------------|-------------|----------------------|-------------------|
| L. SOG           | L. AG             | 0.68          | 0.18        | 0.41                 | 0.23              |
| L. SOG           | R. InsCirc.S      | -0.34         | 0.1         | -0.22                | 0.19              |
| L. SOG           | L. LingualG       | 0.90          | 0.25        | 0.57*                | 0.39              |
| L. SOG           | R. MOcG           | 0.72          | 0.07        | 0.57*                | 0.12              |
| L. SOG           | R. MOcS           | 0.58          | -0.02       | 0.49*                | -0.04             |
| L. SOG           | R. CingMargS      | 0.90          | 0.02        | 0.70** <sup>a</sup>  | 0.03              |
| L. SOG           | L. ParacentralG   | 0.26          | 0.05        | 0.27                 | 0.09              |
| L. SOG           | L. JensenS        | 0.06          | -0.09       | 0.19                 | -0.33             |
| R. SOG           | R. LingualG       | 0.97          | 0.09        | 0.67** <sup>a</sup>  | 0.10              |
| R. SOG           | R. MOcS           | 0.90          | -0.02       | 0.76*** <sup>a</sup> | -0.02             |
| R. SOG           | L. ParOccS        | 0.87          | 0.25        | 0.88*** <sup>a</sup> | 0.36              |
| R. SOG           | R. SubparietalS   | 1.21          | 0.22        | 0.80*** <sup>a</sup> | 0.29              |
| R. SupParG       | R. SOG            | 0.68          | 0.11        | 0.80*** <sup>a</sup> | 0.22              |

Note1: Acronyms for FreeSurfer regions: SOG: superior occipital gyrus; AG: angular gyrus; InsCirc.S: inferior insular circular sulcus. MOcG: middle occipital gyrus; MOcS: middle occipital lunatus; CingMargS: cingulate sulcus (marginal branch). ParOccS: parieto-occipital sulcus.

Note2: Significance of correlations: \*  $p < .05$ , \*\*  $p < .01$ , \*\*\*  $p < .001$ . Correlations were calculated after partialling the effect of age from both regions.

<sup>a</sup> Superscript indicates that the two correlations are significantly different.

## References

- Yarkoni, T., Poldrack, R. A., Nichols, T. E., Van Essen, D. C., & Wager, T. D. (2011). Large-scale automated synthesis of human functional neuroimaging data. *Nature methods*, 8(8), 665-670. doi: 10.1038/nmeth.1635
